# Supplementary material for: Large-scale and high-resolution mass spectrometry-based proteomics profiling defines molecular subtypes of esophageal cancer for therapeutic targeting
Source: PubMed Central journal article supplement (PMC8368010; doi:10.1038/s41467-021-25202-5), 2021-08-16
Supplement: 41467_2021_25202_MOESM2_ESM.pdf [file 41467_2021_25202_MOESM2_ESM.pdf]

## Description of Additional Supplementary Files

File Name: Supplementary Data 1

Description: **Clinical information and proteomic data of the 124 patients with esophageal cancer (EC).** (A) Clinical data. (B) Expression ratios (tumor versus non-tumor) of 9,300 proteins quantified with high confidence in at least half samples. (C) Abundance of 61,471 phosphosites quantified in at least half samples. (D) Subcellular distribution of proteins and phosphoproteins. *P* values were calculated by two-sided Wilcoxon signed-rank test.

File Name: Supplementary Data 2

Description: **Dysregulated proteins and pathways in EC.** (A) Differentially expressed proteins (tumor versus non-tumor). (B) Esophageal specific proteins. *P* values were calculated by two-sided Wilcoxon signed-rank test. (C) Differentially expressed phosphosites (tumor versus non-tumor). (D, E) Enrichment analysis of differentially expressed proteins (D) and phosphorylated proteins (E) (tumor versus non-tumor). *P* values were calculated by hypergeometric test. (F) Pathways used for heatmap. (G) EC-associated risk proteins. *P* values were calculated by two-sided Wilcoxon signed-rank test.

File Name: Supplementary Data 3

Description: **Proteomic analysis of the mutated genes.** (A) Survival analysis for significantly mutated genes. The two-sided Cox *P* values were calculated using the Cox PH model. (B) Proteomic analysis of mutated genes in the genomic altered pathways. *P* values were calculated by two-sided Wilcoxon signed-rank test. Log-rank *P* values were by two-sided log-rank test. (C) Phosphorylation sites of mutated genes in the genomic altered pathways. *P* values were calculated by two-sided Wilcoxon signed-rank test.

File Name: Supplementary Data 4

Description: **Molecular subtypes of EC.** (A) Molecular subtype. (B) Univariate and multivariate analysis of factors associated with overall survival (OS) and disease-free survival (DFS). <sup>a</sup>*P* values were calculated by univariate Cox regression analysis; <sup>b</sup>*P* values were calculated by multivariate Cox regression analysis. (C) Clinicopathologic correlation. *P* values were calculated by the  $\chi^2$ -test or Fisher's exact test, unless otherwise stated. \*Two-sided Wilcoxon rank-sum test. (D, E) Differentially expressed proteins (D) and phosphosites (E) (S2 versus S1). (F, G) Enrichment analysis of differentially expressed proteins (F) and phosphorylated proteins (G) (S2 versus S1). *P* values were calculated by hypergeometric test. *Q* values were adjusted *P* values by BH correction.

File Name: Supplementary Data 5

Description: **Subtype prediction and immunohistochemical (IHC) validation.** (A) Frequencies of identified signatures. (B) Average predictive performance of the 11 signatures. (C) Detailed clinical information of the 295 EC patients that used for immunohistochemical analysis. (D) Immunohistochemistry scores and the predicted subtypes.

File Name: Supplementary Data 6

Description: **Drug prediction and validation.** (A) Query signature for EC. (B) Drug prediction for EC. *P* values were calculated by one-sided permutation test. (C) Query signature for S2-subtype. (D) Drug prediction for S2-subtype. *P* values were calculated by one-sided permutation test. (E) IC 50 values for Sulconazole, Menadione, and GW8510 in EC cell lines as indicated. (F) Proteomic data of KYSE150 cells. (G-I) Expression changes of proteins differentially expressed between S1 and S2 subtype in response to GW8510 (G), Menadione (H) and Sulconazole (I) in KYSE150 cells. The two-sided Cox *P* values were calculated using the Cox PH model.
